# Supplementary material for: Quality of Life, Anxiety and Depression in Women Treated with Hysteroscopic Endometrial Resection or Ablation for Heavy Menstrual Bleeding: Systematic Review and Meta-Analysis of Randomized Controlled Trials
Source: MDPI journal article supplement (doi:10.3390/medicina58111664), 2022-11-17
Supplement: s1 [file s1]

**Table S1. Search query for MEDLINE (accessed through PubMed=**

((("endometrial"[All Fields] AND ("resect"[All Fields] OR "resectability"[All Fields] OR "resectable"[All Fields] OR "resectates"[All Fields] OR "resected"[All Fields] OR "resecting"[All Fields] OR "resection"[All Fields] OR "resectional"[All Fields] OR "resectioned"[All Fields] OR "resectioning"[All Fields] OR "resections"[All Fields] OR "resective"[All Fields] OR "resects"[All Fields])) OR ("endometrial ablation techniques"[MeSH Terms] OR ("endometrial"[All Fields] AND "ablation"[All Fields] AND "techniques"[All Fields]) OR "endometrial ablation techniques"[All Fields] OR ("endometrial"[All Fields] AND "ablation"[All Fields]) OR "endometrial ablation"[All Fields])) AND ("hysteroscopy"[MeSH Terms] OR "hysteroscopy"[All Fields] OR "hysteroscopies"[All Fields] OR "resectoscopy"[All Fields])) AND ("hysterectomy"[MeSH Terms] OR "hysterectomy"[All Fields] OR "hysterectomies"[All Fields])) AND (randomizedcontrolledtrial[Filter])
